# Supplementary material for: Combining second harmonic generation and multiphoton excited photo-luminescence to investigate TiO2 nanoparticle powders
Source: Royal Society of Chemistry journal article supplement (doi:10.1039/d3cp02113k), 2023-01-01
Supplement: d3cp02113k1.pdf [file d3cp02113k1.pdf]

## Supplement Information File

### Combining Multiphoton Excited Photoluminescence and Second Harmonic Generation to investigate TiO<sub>2</sub> Nanoparticle Powders.

Christian Jonin<sup>1\*</sup>, Estelle Salmon<sup>2</sup>, Faheem Ahmed<sup>3</sup>,

Mohammed Benali Kanoun<sup>3</sup>, Chawki Awada<sup>3</sup>, and Pierre –Francois Brevet<sup>2</sup>

#### 1 Polarization Resolved Intensity Plots of SHG and MEPL at 788 nm excitation wavelength

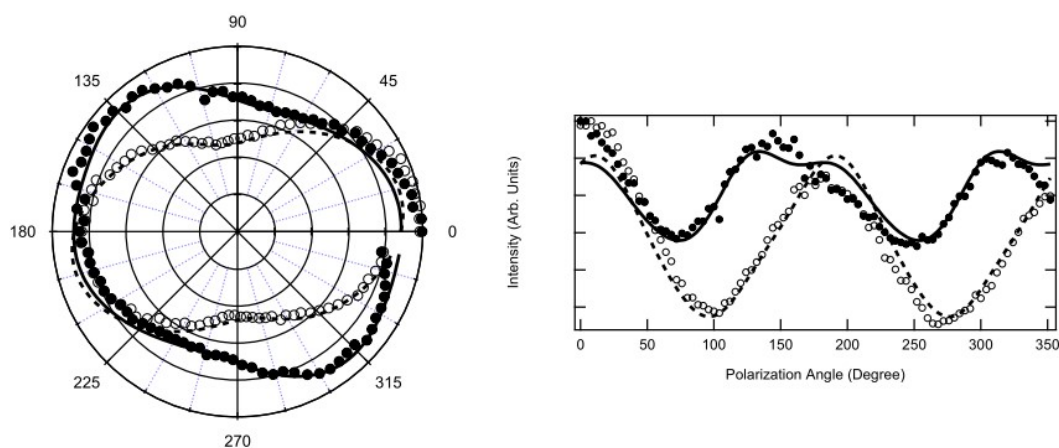

**Figure S1a :** Polar graphs of the SHG (full circles) band and the MEPL (empty circles) contributions. The SHG and MEPL curve fits are in solid and dashed lines, respectively. The depth position is  $z = -0.012$  mm

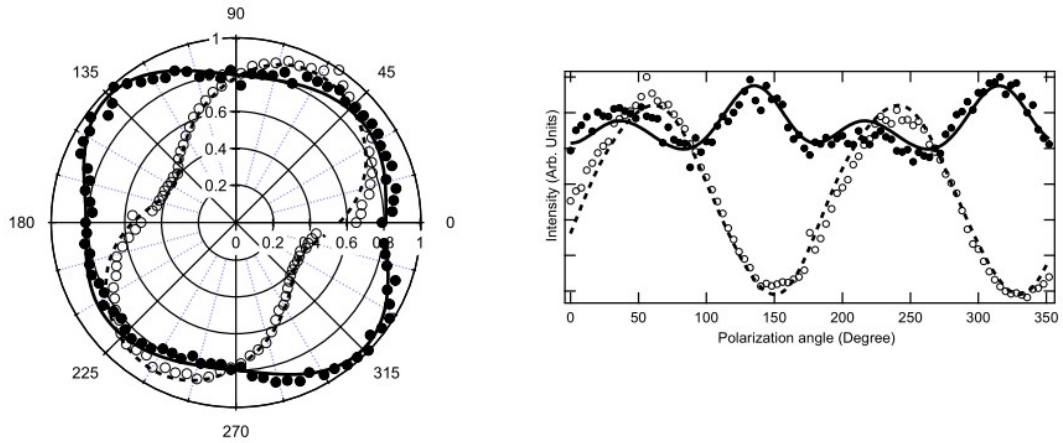

**Figure S1b :** Polar graphs of the SHG (full circles) band and the MEPL (empty circles) contributions. The SHG and MEPL curve fits are in solid and dashed lines, respectively. The depth position is  $z = 0.008$  mm

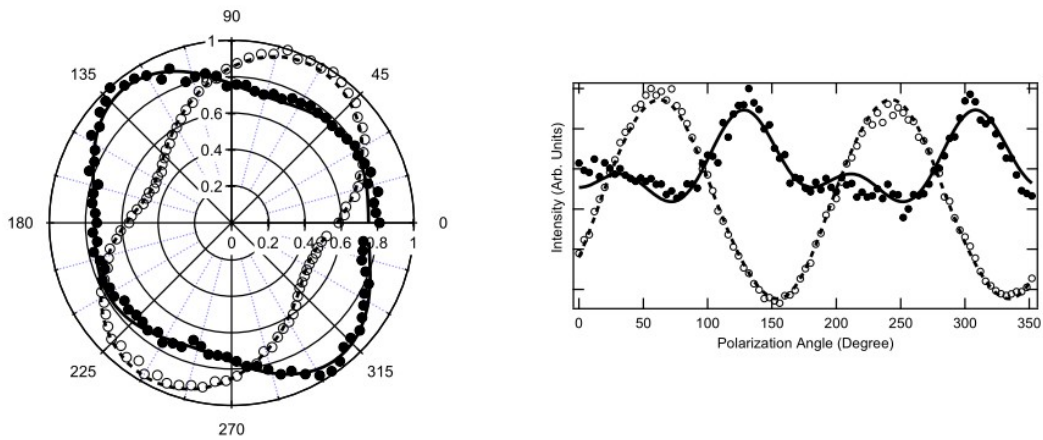

**Figure S1c :** Polar graphs of the SHG (full circles) band and the MEPL (empty circles) contributions. The SHG and MEPL curve fits are in solid and dashed lines, respectively. The depth position is  $z = 0.012$  mm

## 2 Depth dependance of the $\alpha(z)$ parameter

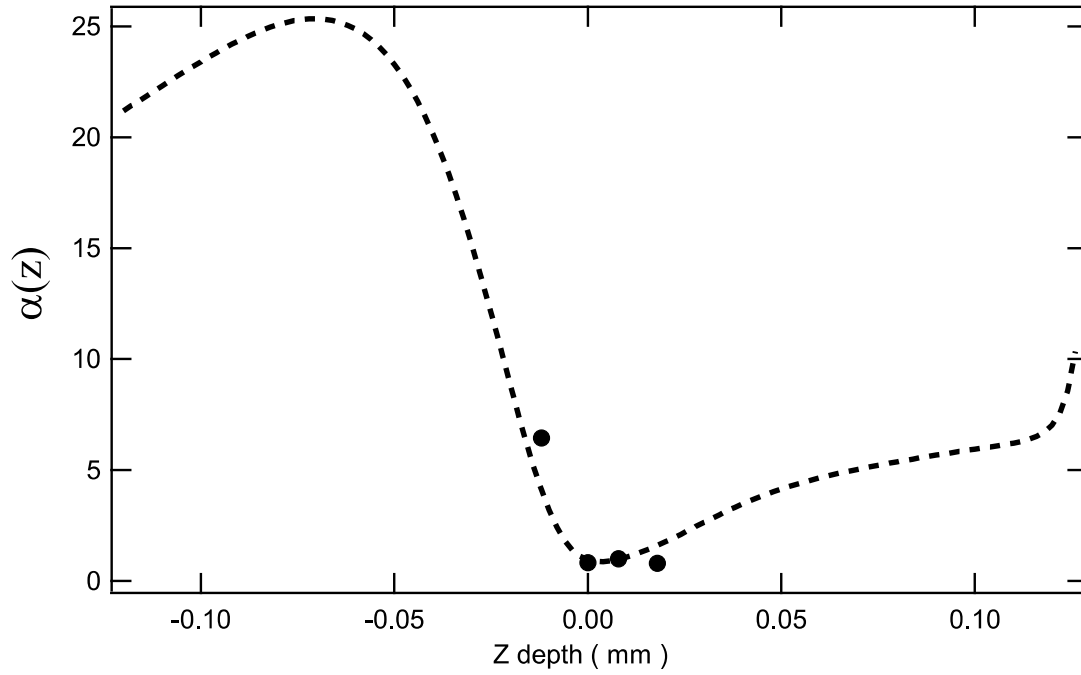

**Figure S2** : Depth dependence of the  $\alpha(z)$  parameter determined from the polar graphs fitted with Eqs.(1)-(3). Dashed line is an adjustment using Eq.(4).

### 3 Adjustment Parameters of the SHG and MEPL contributions at 772 and 788 nm excitation wavelength

**Table S1** : Parameters of the adjustment procedure of the polarization graph given in Figure 3 using Eqs.(1)-(3) and recorded at a fundamental wavelength of 772 nm.

| Fit Parameters | $z = 0$          |
|----------------|------------------|
| $a_0$          | $0.15 \pm 0.05$  |
| $a_1$          | $-0.01 \pm 0.01$ |
| $a_2$          | $-0.25 \pm 0.05$ |

|                 |                  |
|-----------------|------------------|
| $a_3$           | $-0.27 \pm 0.03$ |
| $a_4$           | $-0.15 \pm 0.05$ |
| $a_5$           | $0.22 \pm 0.08$  |
| $\gamma_{SHG}$  | $6.78 \pm 0.10$  |
| $b_0$           | $0.02 \pm 0.01$  |
| $b_1$           | $0.02 \pm 0.01$  |
| $b_2$           | $0.33 \pm 0.07$  |
| $b_3$           | $0.31 \pm 0.08$  |
| $b_4$           | $0.70 \pm 0.10$  |
| $b_5$           | $-0.18 \pm 0.02$ |
| $b_6$           | $0.29 \pm 0.01$  |
| $b_7$           | $0.60 \pm 0.10$  |
| $\gamma_{MEPL}$ | $-2.80 \pm 0.10$ |

**Table S2** : Parameters of the adjustment procedure of the polarization graphs given in Figure 5 and Figure S1 using Eqs.(1)-(3) and recorded at a fundamental wavelength of 788 nm for different z depth positions in mm.

| Fit        | $z = -0.012$ | $z = 0$ | $z = 0.008$ | $z = 0.018$ |
|------------|--------------|---------|-------------|-------------|
| Parameters |              |         |             |             |

|                 |                  |                  |                  |                  |
|-----------------|------------------|------------------|------------------|------------------|
| $a_0$           | $-0.14 \pm 0.06$ | $0.17 \pm 0.03$  | $0.03 \pm 0.07$  | $0.08 \pm 0.02$  |
| $a_1$           | $-0.09 \pm 0.01$ | $0.40 \pm 0.10$  | $-0.42 \pm 0.08$ | $-0.40 \pm 0.10$ |
| $a_2$           | $-0.26 \pm 0.04$ | $0.53 \pm 0.07$  | $0.59 \pm 0.01$  | $0.64 \pm 0.06$  |
| $a_3$           | $-0.34 \pm 0.06$ | $0.50 \pm 0.10$  | $-0.86 \pm 0.04$ | $-1.32 \pm 0.08$ |
| $a_4$           | $-0.14 \pm 0.06$ | $0.18 \pm 0.02$  | $0.02 \pm 0.08$  | $0.08 \pm 0.02$  |
| $a_5$           | $0.40 \pm 0.10$  | $0.62 \pm 0.08$  | $0.41 \pm 0.09$  | $0.53 \pm 0.07$  |
| $\gamma_{SHG}$  | $8.32 \pm 0.08$  | $2.09 \pm 0.01$  | $9.22 \pm 0.08$  | $3.74 \pm 0.06$  |
| $b_0$           | $-0.08 \pm 0.02$ | $0.42 \pm 0.08$  | $0.20 \pm 0.10$  | $0.23 \pm 0.07$  |
| $b_1$           | $0.20 \pm 0.10$  | $-0.03 \pm 0.07$ | $0.48 \pm 0.02$  | $0.46 \pm 0.04$  |
| $b_2$           | $0.14 \pm 0.06$  | $0.75 \pm 0.05$  | $0.42 \pm 0.08$  | $0.54 \pm 0.06$  |
| $b_3$           | $0.23 \pm 0.07$  | $-0.03 \pm 0.07$ | $0.85 \pm 0.05$  | $0.81 \pm 0.09$  |
| $b_4$           | $0.57 \pm 0.03$  | $0.59 \pm 0.01$  | $0.07 \pm 0.03$  | $0.29 \pm 0.01$  |
| $b_5$           | $0.30 \pm 0.10$  | $0.04 \pm 0.06$  | $0.55 \pm 0.05$  | $0.46 \pm 0.04$  |
| $b_6$           | $0.28 \pm 0.02$  | $0.14 \pm 0.06$  | $0.01 \pm 0.09$  | $0.02 \pm 0.01$  |
| $b_7$           | $0.57 \pm 0.03$  | $0.64 \pm 0.06$  | $0.57 \pm 0.03$  | $0.59 \pm 0.01$  |
| $\gamma_{MEPL}$ | $-6.25 \pm 0.05$ | $-0.78 \pm 0.02$ | $2.07 \pm 0.03$  | $4.20 \pm 0.10$  |

#### 4 Numerical values for the depth dependance of the $\alpha(z)$ parameter

**Table S3 :**  $\alpha(z)$  parameter value provided for  $\gamma = 0$  and at for the different depth.

|               |                 |                 |                 |                 |
|---------------|-----------------|-----------------|-----------------|-----------------|
| Z depth in mm | -0.012          | 0               | 0.008           | 0.018           |
| $\alpha(z)$   | $6.44 \pm 0.60$ | $0.82 \pm 0.08$ | $1.00 \pm 0.10$ | $0.79 \pm 0.08$ |

## 5 Anatase TiO<sub>2</sub> powder

Scanning Electron micrograph (SEM) picture of the TiO<sub>2</sub> nanoparticle powder sample.

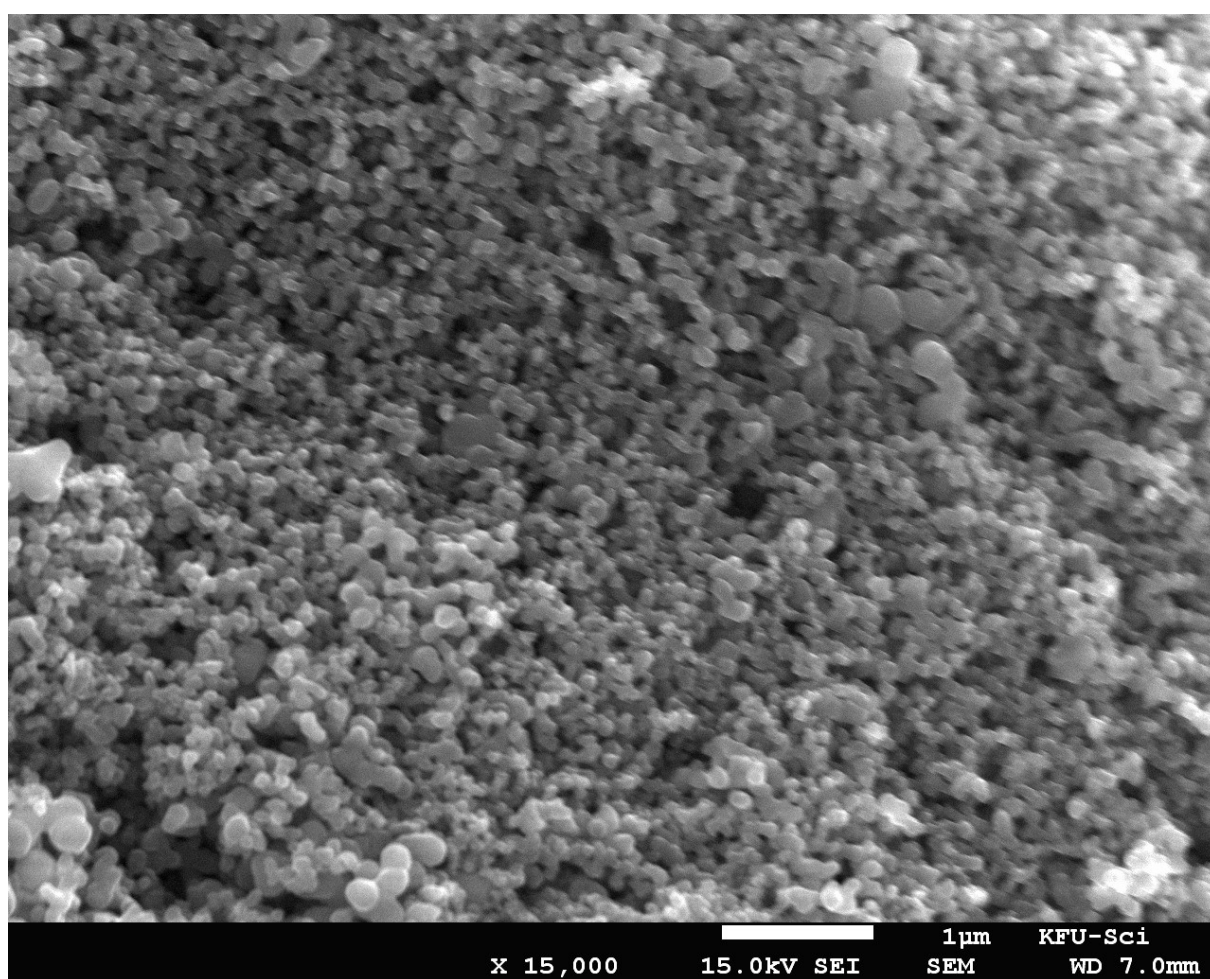

**Figure S3** : Scanning Electron Micrograph (SEM) image of the anatase TiO<sub>2</sub> powder sample.

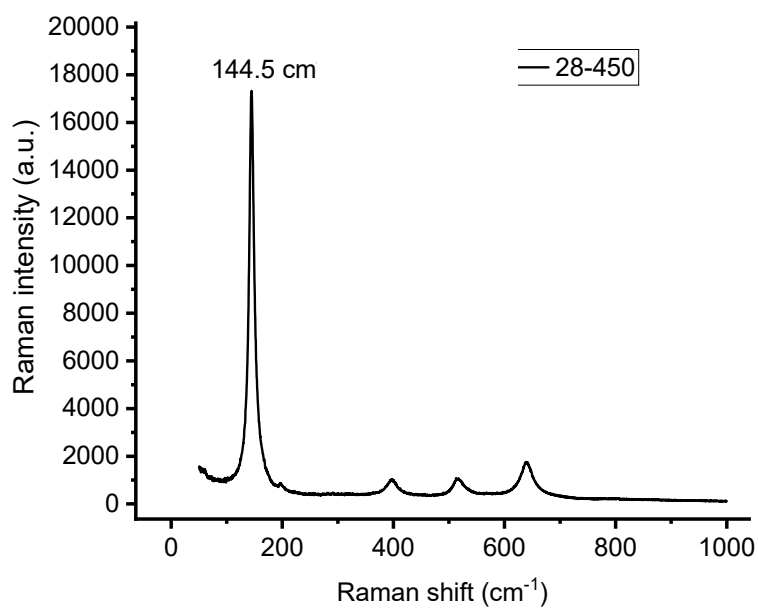

**Figure S4 :** Raman spectra of pure TiO<sub>2</sub> nanoparticles. An intense Raman peak at 145 cm<sup>-1</sup> is observed, which can be assigned to the E<sub>g</sub> optical Raman mode of anatase TiO<sub>2</sub>. The other Raman peaks at 196 cm<sup>-1</sup>, 394 cm<sup>-1</sup>, 512 cm<sup>-1</sup>, and 636 cm<sup>-1</sup> were assigned to E<sub>g</sub>, B<sub>1g</sub>, A<sub>1g</sub>, and E<sub>g</sub> Raman modes of anatase TiO<sub>2</sub>, respectively.

## 6 Schematics of the experimental setup

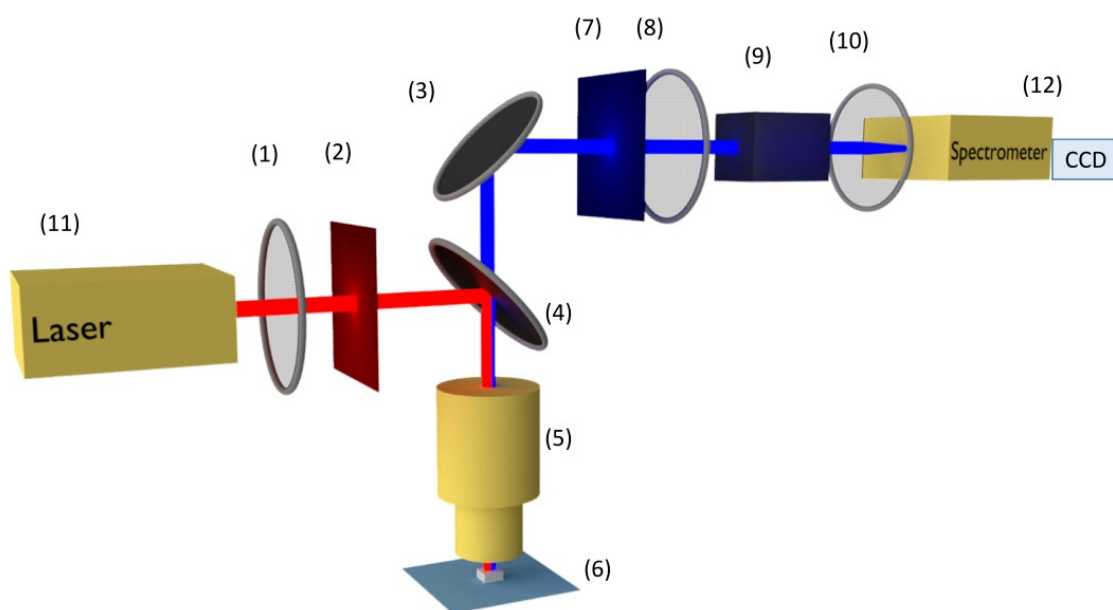

**Figure S5** : Schematics of the Experimental setup : (1) Half waveplate (2) Low pass filter (3) mirror (4) Dichroic Mirror (5)Microscope Objective (6) sample (7) High pass filter (8) Half waveplate (9) polarizing Cube (10) Lense (11) Ti:Sa femtosecond laser (12) Detection system.
